# Supplementary material for: Stressed, Lonely, and Overcommitted: Predictors of Lawyer Suicide Risk
Source: Healthcare (Basel). 2023 Feb 11;11(4):536. doi: 10.3390/healthcare11040536 (PMC9956925; doi:10.3390/healthcare11040536)
Supplement: Supplementary file 1 [file healthcare-11-00536-s001.zip › healthcare-2181911-supplementary.pdf]

**Supplementary Table S1.** Predictors of PHQ-9 suicidal ideation among lawyers controlling for perceived influence of COVID-19 on PHQ-9 depression symptoms (N = 1962).

|                                                                               | OR         | 95% CI          |
|-------------------------------------------------------------------------------|------------|-----------------|
| <b>Gender</b> (ref. female)                                                   |            |                 |
| Male                                                                          | 1.960 ***  | (1.367–2.811)   |
| <b>Dx History</b> (ref. no hx)                                                |            |                 |
| Yes                                                                           | 1.804 ***  | (1.247–2.63)    |
| <b>UCLA Loneliness</b> (ref. not Lonely)                                      |            |                 |
| Lonely                                                                        | 2.842 ***  | (1.932–4.180)   |
| <b>PSS-Perceived Stress Scale</b> (ref. Low)                                  |            |                 |
| Low                                                                           |            |                 |
| Intermediate                                                                  | 5.960 ***  | (2.959 -12.004) |
| High                                                                          | 24.805 *** | (11.221–54.833) |
| <b>Work Overcommitment</b> (ref. Low)                                         |            |                 |
| Low                                                                           |            |                 |
| Intermediate                                                                  | 1.558      | (0.835–2.906)   |
| High                                                                          | 2.150 **   | (1.175–3.935)   |
| <b>Perceived COVID-19 Impact on PHQ-9 depression</b> (ref. Remained the same) |            |                 |
| Remained the same                                                             |            |                 |
| Decreased                                                                     | 0.495      | (0.182–1.351)   |
| Increased                                                                     | 0.695      | (0.472–1.023)   |

\* Significant difference from referent \*\*  $p \leq 0.01$ ; \*\*\*  $p \leq 0.001$ ; OR = odds ratio; CI = confidence interval.
